# Supplementary material for: Theoretical study and design of multifunctional phosphorescent platinum(ii) complexes containing triarylboron moieties for efficient OLED emitters
Source: Royal Society of Chemistry journal article supplement (doi:10.1039/c4cp04919e), 2014-12-01
Supplement: c4cp04919e1.pdf [file c4cp04919e1.pdf]

## Electronic Supplementary Information

### Theoretical study and design of multifunctional phosphorescent platinum(II) complexes containing triarylboron moieties for efficient OLED emitters

Yong Wu, Guo-Gang Shan, Hai-Bin Li, Shui-Xing Wu, Xin-Yao Ren, Yun Geng,\* and Zhong-Min Su\*

*Institute of Functional Material Chemistry, Faculty of Chemistry, Northeast Normal University, Changchun 130024, China.*

*E-mail: [gengy575@nenu.edu.cn](mailto:gengy575@nenu.edu.cn); [zmsu@nenu.edu.cn](mailto:zmsu@nenu.edu.cn)*

**Table S1** Optimized bond lengths [ $\text{\AA}$ ] and angles [ $^\circ$ ] for complex **1** obtained by different level of theories compared to experimental values.

|         | TPSS  | TPSSh | B3LYP | PBE0  | Expt. |
|---------|-------|-------|-------|-------|-------|
| Pt-C    | 1.980 | 1.975 | 1.983 | 1.964 | 1.967 |
| Pt-N    | 2.009 | 2.005 | 2.019 | 1.994 | 1.995 |
| Pt-O1   | 2.014 | 2.010 | 2.025 | 2.006 | 1.997 |
| Pt-O2   | 2.097 | 2.093 | 2.114 | 2.091 | 2.081 |
| C-Pt-O2 | 174.4 | 174.6 | 174.9 | 174.7 | 174.3 |
| N-Pt-O1 | 175.3 | 175.4 | 175.7 | 175.7 | 174.5 |

**Table S2** The calculated emission wavelengths and the first singlet ( $S_1$ ) excitation energies of **1** and **2** in  $\text{CH}_2\text{Cl}_2$  solutions with different methods, together with their experimental values.

|                                                        | TD-TPSS | TD-TPSSh | TD-B3LYP | TD-PBE0 | TD-PBE0/TDA | TD-M062X | Expt. |
|--------------------------------------------------------|---------|----------|----------|---------|-------------|----------|-------|
| $S_1$ excitation energy ( $\lambda_{\text{abs}}$ , nm) |         |          |          |         |             |          |       |
| <b>1</b>                                               | 566     | 493      | 448      | 428     | 422         | 360      | 426   |
| <b>2</b>                                               | 637     | 556      | 505      | 481     | 470         | 406      | 474   |
| Emission wavelength ( $\lambda_{\text{em}}$ , nm)      |         |          |          |         |             |          |       |
| <b>1</b>                                               | 691     | 644      | 613      | 615     | 579         | 531      | 527   |
| <b>2</b>                                               | 811     | 744      | 695      | 690     | 655         | 597      | 596   |

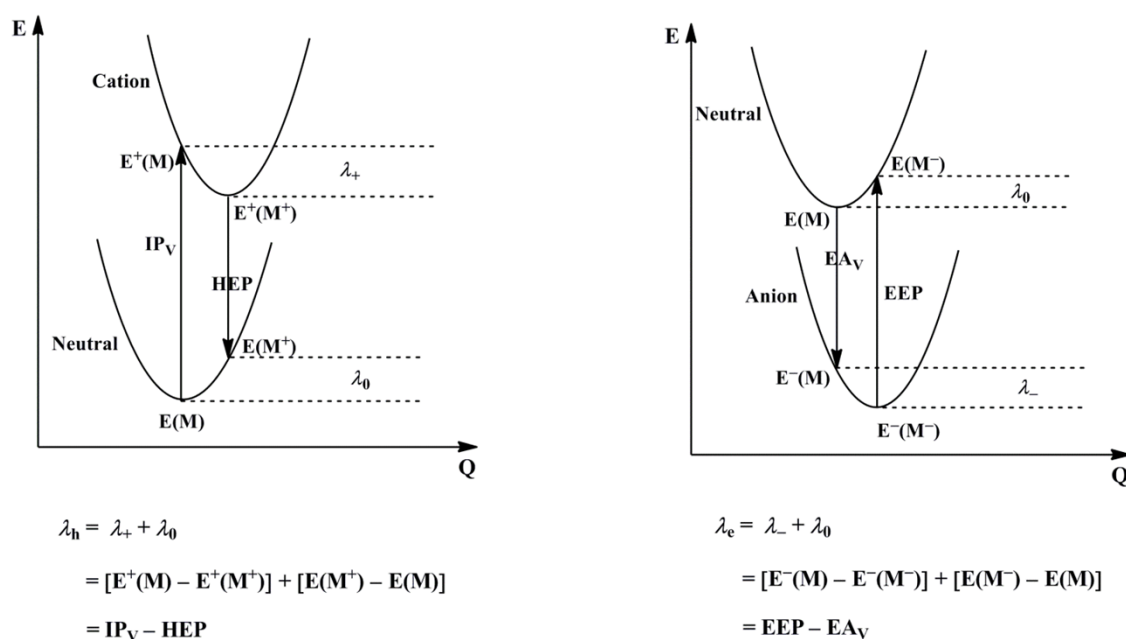

**Fig. S1** The potential energy surfaces of the corresponding ground and ionic states, as well as the formulas of hole/electron reorganization energies ( $\lambda_h/\lambda_e$ ).  $E^+(M)/E^-(M)$  and  $E(M^+)/E(M^-)$  represent the energies of cation/anion and neutral species with the geometries of neutral and cation/anion respectively, while  $E^+(M^+)/E^-(M^-)$  and  $E(M)$  represent the energies of the cation/anion and neutral species in their optimized geometries, respectively.

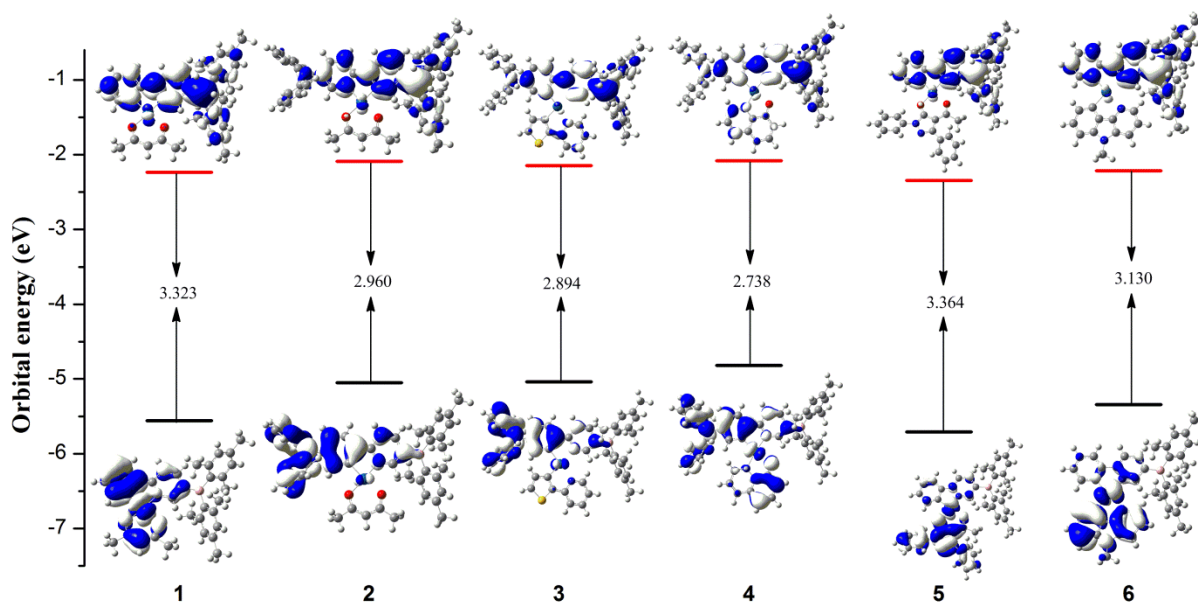

**Fig. S2** Calculated electronic structures and isodensity surface plots of HOMO (bottom) and LUMO (top) for 1–6 at their  $T_1$  optimized geometries.

**Table S3** MO composition of 5d(Pt), h (NPh<sub>2</sub>, pzl, NCaz), B in their corresponding frontier molecular orbitals.

| Complex  | 5d(Pt)% in HOMO | h% in HOMO | B% in LUMO |
|----------|-----------------|------------|------------|
| <b>1</b> | 36.55           | —          | 27.05      |
| <b>2</b> | 1.35            | 61.43      | 26.90      |
| <b>3</b> | 2.05            | 61.30      | 24.44      |
| <b>4</b> | 9.18            | 33.34      | 22.28      |
| <b>5</b> | 21.50           | 70.07      | 26.90      |
| <b>6</b> | 31.37           | 54.22      | 20.61      |

**Table S4** Vertical excitation energies ( $\lambda$ /nm), oscillator strengths ( $f$ ), dominant configurations and corresponding assignments of the most relevant singlet excited states of **1-6** at their respective  $S_0$  optimized geometries obtained from TD-PBE0 calculations in CH<sub>2</sub>Cl<sub>2</sub> solution.

| Complex         | State           | $\lambda$ /nm | $f$           | Configuration <sup>a</sup>     | Nature                    | Exp./nm |
|-----------------|-----------------|---------------|---------------|--------------------------------|---------------------------|---------|
| <b>1</b>        | S <sub>1</sub>  | 428           | 0.1783        | H→L (81%)                      | MLCT/LLCT                 | 426     |
|                 | S <sub>5</sub>  | 352           | 0.1111        | H-4→L (92%)                    | LC                        |         |
|                 | S <sub>6</sub>  | 341           | 0.1090        | H-5→L (92%)                    | LC                        | 339     |
|                 | S <sub>13</sub> | 300           | 0.2258        | H-1→L+1 (70%)                  | LC/MLCT                   |         |
|                 | S <sub>42</sub> | 238           | 0.2055        | H-8→L+1 (33%)<br>H-7→L+2 (22%) | LLCT/MLCT<br>LLCT         | 231     |
| <b>2</b>        | S <sub>1</sub>  | 481           | 0.8308        | H→L (95%)                      | LC                        | 474     |
|                 | S <sub>5</sub>  | 359           | 0.0748        | H-4→L (90%)                    | LC/MLCT                   |         |
|                 | S <sub>15</sub> | 299           | 0.1950        | H→L+4 (86%)                    | LC                        | 302     |
|                 | S <sub>46</sub> | 246           | 0.1423        | H-1→L+4 (39%)<br>H-1→L+5 (26%) | LC/LLCT/MLCT<br>LLCT/MLCT | 241     |
| <b>3</b>        | S <sub>1</sub>  | 496           | 0.6504        | H→L (92%)                      | LC                        |         |
|                 | S <sub>7</sub>  | 363           | 0.0940        | H-5→L (58%)                    | LC/LLCT/MLCT              |         |
|                 |                 |               |               | H-4→L (34%)                    | LC/LLCT/MLCT              |         |
|                 | S <sub>22</sub> | 299           | 0.2482        | H-4→L+1 (32%)                  | LC/MLCT                   |         |
|                 |                 |               |               | H-1→L+3 (16%)                  | LC/MLCT                   |         |
| H→L+5 (19%)     |                 |               |               | LC                             |                           |         |
| S <sub>31</sub> | 277             | 0.1167        | H-2→L+3 (77%) | LLCT/MLCT                      |                           |         |
| <b>4</b>        | S <sub>1</sub>  | 503           | 0.3034        | H-1→L (36%)                    | LLCT/MLCT                 |         |
|                 |                 |               |               | H→L (57%)                      | LC/LLCT/MLCT              |         |
|                 | S <sub>2</sub>  | 480           | 0.4905        | H-1→L (55%)<br>H→L (39%)       | LLCT/MLCT<br>LC/LLCT/MLCT |         |

|          |                 |     |        |               |              |
|----------|-----------------|-----|--------|---------------|--------------|
|          | S <sub>15</sub> | 329 | 0.0977 | H-8→L (75%)   | LLCT/MLCT    |
|          | S <sub>20</sub> | 300 | 0.1731 | H-9→L (20%)   | LC/MLCT      |
|          |                 |     |        | H→L +5(19%)   | LLCT/MLCT    |
|          |                 |     |        | H→L+6 (44%)   | LLCT/MLCT    |
| <b>5</b> | S <sub>1</sub>  | 422 | 0.1933 | H-1→L (92%)   | LC/LLCT/MLCT |
|          | S <sub>13</sub> | 306 | 0.3043 | H→L+2 (66%)   | LC           |
|          | S <sub>24</sub> | 269 | 0.1495 | H→L+4 (52%)   | LC/MLCT      |
| <b>6</b> | S <sub>1</sub>  | 453 | 0.0316 | H→L (75%)     | LLCT/MLCT    |
|          | S <sub>2</sub>  | 427 | 0.1772 | H-1→L (74%)   | LC/LLCT/MLCT |
|          |                 |     |        | H→L (19%)     | LLCT/MLCT    |
|          | S <sub>7</sub>  | 352 | 0.1972 | H-5→L (84%)   | LC/MLCT      |
|          | S <sub>15</sub> | 315 | 0.3079 | H-9→L (38%)   | LC/MLCT      |
|          |                 |     |        | H-1→L+2 (21%) | LC/LLCT/MLCT |
|          | S <sub>34</sub> | 259 | 0.1690 | H-4→L+2 (14%) | LC/LLCT      |
|          |                 |     |        | H-3→L+3 (14%) | MLCT         |
|          |                 |     |        | H→L+4 (29%)   | MLCT         |

<sup>a</sup> H and L denote HOMO and LUMO respectively.

**Table S5** Cartesian coordinates of complex **1** at the  $S_0$  and  $T_1$  optimized geometries.

|    | $S_0$     |           |           | $T_1$ |           |           |           |
|----|-----------|-----------|-----------|-------|-----------|-----------|-----------|
| C  | -4.847167 | -3.823157 | 0.480342  | C     | -4.909298 | -3.771695 | 0.375285  |
| C  | -4.589160 | -2.478312 | 0.232559  | C     | -4.627152 | -2.433717 | 0.182467  |
| H  | -5.409540 | -1.787567 | 0.058209  | H     | -5.426346 | -1.711746 | 0.041882  |
| C  | -3.276439 | -1.995449 | 0.205302  | C     | -3.298238 | -1.973406 | 0.162368  |
| C  | -2.227524 | -2.921784 | 0.438544  | C     | -2.207388 | -2.942282 | 0.354465  |
| C  | -2.492167 | -4.275100 | 0.687814  | C     | -2.527341 | -4.308749 | 0.551097  |
| H  | -1.679995 | -4.976396 | 0.865475  | H     | -1.740906 | -5.043932 | 0.694279  |
| C  | -3.802977 | -4.725489 | 0.708407  | C     | -3.844874 | -4.701301 | 0.558957  |
| H  | -4.016742 | -5.773066 | 0.900964  | H     | -4.084725 | -5.751162 | 0.709713  |
| C  | -0.898149 | -2.342598 | 0.394967  | C     | -0.911346 | -2.394416 | 0.323718  |
| C  | 0.318322  | -3.003480 | 0.593123  | C     | 0.328369  | -3.066016 | 0.486403  |
| H  | 0.316224  | -4.066704 | 0.808714  | H     | 0.322569  | -4.137516 | 0.663581  |
| C  | 1.507123  | -2.301136 | 0.512772  | C     | 1.508791  | -2.375796 | 0.430488  |
| H  | 2.453243  | -2.816357 | 0.662330  | H     | 2.452789  | -2.895706 | 0.569742  |
| C  | 1.512459  | -0.917985 | 0.248779  | C     | 1.526490  | -0.958419 | 0.207960  |
| C  | 0.258965  | -0.326443 | 0.068007  | C     | 0.253364  | -0.354818 | 0.058526  |
| H  | 0.155497  | 0.734142  | -0.141540 | H     | 0.169777  | 0.713668  | -0.117488 |
| C  | -6.316907 | 2.041433  | -0.654764 | C     | -6.305486 | 2.102724  | -0.512955 |
| H  | -6.724024 | 1.445609  | -1.479076 | H     | -6.735289 | 1.535277  | -1.345609 |
| H  | -6.553255 | 3.094185  | -0.823341 | H     | -6.524546 | 3.163395  | -0.650801 |
| H  | -6.811859 | 1.703146  | 0.261995  | H     | -6.792325 | 1.750127  | 0.402797  |
| C  | -4.836165 | 1.793756  | -0.543928 | C     | -4.829070 | 1.825577  | -0.431011 |
| C  | -3.950433 | 2.867257  | -0.678113 | C     | -3.925155 | 2.888855  | -0.539405 |
| H  | -4.389582 | 3.842498  | -0.855228 | H     | -4.348568 | 3.876868  | -0.678090 |
| C  | -2.548828 | 2.801150  | -0.616814 | C     | -2.526492 | 2.795902  | -0.500415 |
| C  | -1.739612 | 4.055486  | -0.818487 | C     | -1.691285 | 4.033345  | -0.674392 |
| H  | -0.958803 | 4.112609  | -0.053048 | H     | -0.901391 | 4.051574  | 0.083555  |
| H  | -2.352727 | 4.959425  | -0.790884 | H     | -2.282915 | 4.950022  | -0.620666 |
| H  | -1.232613 | 4.004338  | -1.789527 | H     | -1.190801 | 3.992212  | -1.649266 |
| N  | -0.893696 | -1.001482 | 0.130291  | N     | -0.891204 | -1.009376 | 0.107695  |
| O  | -4.541326 | 0.567782  | -0.329516 | O     | -4.551392 | 0.589179  | -0.264891 |
| O  | -1.865569 | 1.749788  | -0.417622 | O     | -1.859922 | 1.721745  | -0.342365 |
| Pt | -2.680805 | -0.151737 | -0.113291 | Pt    | -2.683917 | -0.166856 | -0.089224 |
| B  | 2.822023  | -0.064931 | 0.154653  | B     | 2.803650  | -0.096667 | 0.122837  |
| C  | 2.717918  | 1.500037  | 0.323706  | C     | 2.669344  | 1.482999  | 0.227624  |
| C  | 4.182878  | -0.817764 | -0.108352 | C     | 4.204144  | -0.817139 | -0.060097 |
| C  | 2.085889  | 2.079968  | 1.448254  | C     | 2.070900  | 2.099087  | 1.351990  |
| C  | 1.975628  | 3.469353  | 1.553052  | C     | 1.963088  | 3.492034  | 1.421814  |
| C  | 2.450928  | 4.323166  | 0.562910  | C     | 2.416220  | 4.319369  | 0.399205  |
| C  | 3.080055  | 3.748562  | -0.542637 | C     | 2.998483  | 3.711057  | -0.713601 |
| C  | 3.234365  | 2.370527  | -0.671709 | C     | 3.140181  | 2.328217  | -0.810047 |

|   |           |           |           |   |           |           |           |
|---|-----------|-----------|-----------|---|-----------|-----------|-----------|
| C | 4.349048  | -1.663423 | -1.228853 | C | 4.444094  | -1.686873 | -1.151314 |
| C | 5.562820  | -2.324589 | -1.433516 | C | 5.686512  | -2.309106 | -1.297975 |
| C | 6.626573  | -2.203914 | -0.544954 | C | 6.717896  | -2.123144 | -0.382157 |
| C | 6.457023  | -1.372137 | 0.563012  | C | 6.480847  | -1.266747 | 0.692448  |
| C | 5.272791  | -0.673976 | 0.787337  | C | 5.261741  | -0.611941 | 0.861298  |
| C | 1.538593  | 1.263859  | 2.595902  | C | 1.538756  | 1.311397  | 2.525338  |
| H | 1.507689  | 3.893188  | 2.440781  | H | 1.520325  | 3.940715  | 2.310770  |
| C | 2.290557  | 5.813687  | 0.670681  | C | 2.314616  | 5.816354  | 0.497404  |
| H | 3.471108  | 4.396818  | -1.325523 | H | 3.360534  | 4.334557  | -1.530367 |
| C | 3.935339  | 1.850802  | -1.901261 | C | 3.761640  | 1.766577  | -2.062473 |
| C | 3.267546  | -1.867847 | -2.263821 | C | 3.403510  | -1.959652 | -2.210278 |
| H | 5.678645  | -2.949986 | -2.317802 | H | 5.852591  | -2.954423 | -2.160005 |
| C | 7.915506  | -2.945915 | -0.761354 | C | 8.036809  | -2.827709 | -0.536268 |
| H | 7.277882  | -1.256863 | 1.269413  | H | 7.274111  | -1.096489 | 1.419398  |
| H | 0.453162  | 1.127531  | 2.507319  | H | 0.467676  | 1.097002  | 2.411955  |
| H | 1.721755  | 1.775115  | 3.547543  | H | 1.655206  | 1.879087  | 3.455300  |
| H | 1.982614  | 0.267671  | 2.662723  | H | 2.043089  | 0.349966  | 2.651032  |
| H | 2.050768  | 6.118473  | 1.694173  | H | 1.666638  | 6.120581  | 1.325770  |
| H | 1.480443  | 6.170952  | 0.021668  | H | 1.913472  | 6.253092  | -0.424654 |
| H | 3.202543  | 6.337857  | 0.364026  | H | 3.299468  | 6.270905  | 0.664828  |
| H | 4.250757  | 2.678467  | -2.544313 | H | 4.169429  | 2.566454  | -2.689024 |
| H | 3.285671  | 1.202614  | -2.501382 | H | 3.022662  | 1.224828  | -2.666690 |
| H | 4.822541  | 1.263614  | -1.644069 | H | 4.568893  | 1.063415  | -1.836637 |
| H | 2.578145  | -1.022334 | -2.333150 | H | 2.769575  | -1.090423 | -2.407439 |
| H | 2.659340  | -2.753624 | -2.041609 | H | 2.732102  | -2.776901 | -1.917548 |
| H | 3.709398  | -2.019754 | -3.254493 | H | 3.879199  | -2.251187 | -3.152892 |
| H | 8.017092  | -3.777082 | -0.051862 | H | 8.083034  | -3.725797 | 0.093752  |
| H | 8.782892  | -2.292052 | -0.616125 | H | 8.872472  | -2.183752 | -0.240727 |
| H | 7.972258  | -3.364962 | -1.770766 | H | 8.202675  | -3.145812 | -1.570712 |
| C | 5.184353  | 0.205817  | 2.008864  | C | 5.101768  | 0.287312  | 2.059996  |
| H | 4.981134  | 1.248119  | 1.742511  | H | 4.814932  | 1.303203  | 1.770711  |
| H | 4.382271  | -0.112615 | 2.685984  | H | 4.325254  | -0.082040 | 2.741097  |
| H | 6.119857  | 0.176100  | 2.576250  | H | 6.034381  | 0.345781  | 2.630561  |
| H | -5.875005 | -4.179278 | 0.497534  | H | -5.935462 | -4.126798 | 0.388577  |

**Table S6** Cartesian coordinates of complex **2** at the  $S_0$  and  $T_1$  optimized geometries.

| $S_0$ |           |           |           | $T_1$ |           |           |           |
|-------|-----------|-----------|-----------|-------|-----------|-----------|-----------|
| C     | -4.192064 | -1.387805 | -0.003886 | C     | -4.210172 | -1.378549 | -0.044340 |
| C     | -3.409010 | -0.225429 | -0.041976 | C     | -3.419758 | -0.206115 | -0.065730 |
| H     | -3.890904 | 0.746995  | -0.069227 | H     | -3.902670 | 0.766671  | -0.056115 |
| C     | -2.018642 | -0.293889 | -0.035335 | C     | -2.044341 | -0.272167 | -0.059367 |
| C     | -1.402112 | -1.572384 | 0.024164  | C     | -1.402230 | -1.582916 | -0.038867 |
| C     | -2.185493 | -2.734420 | 0.064422  | C     | -2.208775 | -2.759634 | -0.029705 |
| H     | -1.721071 | -3.717558 | 0.094035  | H     | -1.746989 | -3.742484 | -0.042458 |
| C     | -3.563748 | -2.649464 | 0.045427  | C     | -3.573269 | -2.657521 | -0.032821 |
| H     | -4.168282 | -3.550320 | 0.057615  | H     | -4.187388 | -3.552361 | -0.063386 |
| C     | 0.040149  | -1.544436 | 0.040600  | C     | 0.006680  | -1.561369 | -0.026792 |
| C     | 0.909597  | -2.641103 | 0.106233  | C     | 0.892683  | -2.667901 | 0.004633  |
| H     | 0.496567  | -3.643208 | 0.155442  | H     | 0.478136  | -3.671661 | 0.022180  |
| C     | 2.276077  | -2.439691 | 0.109458  | C     | 2.248977  | -2.476002 | 0.023828  |
| H     | 2.949988  | -3.292093 | 0.157113  | H     | 2.920979  | -3.329170 | 0.063242  |
| C     | 2.817960  | -1.138906 | 0.062824  | C     | 2.807675  | -1.158295 | 0.012774  |
| C     | 1.889283  | -0.095304 | 0.004326  | C     | 1.860566  | -0.102500 | -0.019328 |
| H     | 2.204212  | 0.943302  | -0.037192 | H     | 2.190275  | 0.932092  | -0.037962 |
| C     | -3.288082 | 4.661526  | -0.186129 | C     | -3.280491 | 4.687948  | 0.009127  |
| H     | -3.924676 | 4.307109  | -1.003612 | H     | -3.914919 | 4.395831  | -0.834517 |
| H     | -3.108784 | 5.732584  | -0.302442 | H     | -3.089057 | 5.762180  | -0.037003 |
| H     | -3.839423 | 4.491114  | 0.745561  | H     | -3.839849 | 4.464030  | 0.924538  |
| C     | -2.012243 | 3.863186  | -0.163088 | C     | -2.013107 | 3.875078  | -0.012638 |
| C     | -0.783419 | 4.531077  | -0.170413 | C     | -0.779442 | 4.531670  | -0.001200 |
| H     | -0.817523 | 5.614298  | -0.198859 | H     | -0.803423 | 5.615375  | 0.017371  |
| C     | 0.487553  | 3.933961  | -0.147587 | C     | 0.487930  | 3.923563  | -0.020197 |
| C     | 1.715438  | 4.805843  | -0.181682 | C     | 1.721802  | 4.785687  | -0.043973 |
| H     | 2.416780  | 4.476847  | 0.592240  | H     | 2.463497  | 4.382240  | 0.652782  |
| H     | 1.483281  | 5.864550  | -0.044215 | H     | 1.508660  | 5.829499  | 0.198882  |
| H     | 2.221527  | 4.677603  | -1.145891 | H     | 2.169387  | 4.742438  | -1.044304 |
| N     | 0.565889  | -0.280708 | -0.011900 | N     | 0.552024  | -0.273215 | -0.037931 |
| O     | -2.205018 | 2.599638  | -0.129617 | O     | -2.219700 | 2.613144  | -0.035347 |
| O     | 0.720373  | 2.686034  | -0.113943 | O     | 0.709738  | 2.674137  | -0.039120 |
| Pt    | -0.758658 | 1.210283  | -0.076693 | Pt    | -0.773359 | 1.208324  | -0.042168 |
| B     | 4.352426  | -0.845093 | 0.075082  | B     | 4.319689  | -0.852947 | 0.036469  |
| C     | 4.842767  | 0.601447  | 0.476891  | C     | 4.805671  | 0.622502  | 0.370333  |
| C     | 5.337394  | -2.016455 | -0.313814 | C     | 5.340687  | -2.029655 | -0.264697 |
| C     | 4.453003  | 1.193550  | 1.700609  | C     | 4.424656  | 1.275540  | 1.565820  |
| C     | 4.883997  | 2.482836  | 2.025690  | C     | 4.859930  | 2.578793  | 1.831286  |
| C     | 5.676714  | 3.234437  | 1.164366  | C     | 5.658737  | 3.285749  | 0.939461  |
| C     | 6.059864  | 2.647781  | -0.042604 | C     | 6.036588  | 2.641119  | -0.239633 |
| C     | 5.673066  | 1.356019  | -0.391800 | C     | 5.638143  | 1.338365  | -0.529638 |

|   |           |           |           |   |           |           |           |
|---|-----------|-----------|-----------|---|-----------|-----------|-----------|
| C | 5.214473  | -2.693802 | -1.548943 | C | 5.282664  | -2.762600 | -1.473483 |
| C | 6.085569  | -3.739447 | -1.865459 | C | 6.194492  | -3.793600 | -1.719587 |
| C | 7.072862  | -4.168649 | -0.984210 | C | 7.168331  | -4.153613 | -0.794273 |
| C | 7.190898  | -3.498776 | 0.234357  | C | 7.223019  | -3.433243 | 0.399539  |
| C | 6.360074  | -2.433788 | 0.575386  | C | 6.344861  | -2.386033 | 0.671112  |
| C | 3.596633  | 0.481784  | 2.721627  | C | 3.561753  | 0.618653  | 2.616508  |
| H | 4.592808  | 2.907057  | 2.985897  | H | 4.569844  | 3.047699  | 2.771358  |
| C | 6.105391  | 4.632379  | 1.512853  | C | 6.104304  | 4.692732  | 1.226926  |
| H | 6.687741  | 3.212410  | -0.730526 | H | 6.667155  | 3.169627  | -0.953841 |
| C | 6.132087  | 0.815169  | -1.721917 | C | 6.089363  | 0.736133  | -1.835230 |
| C | 4.185055  | -2.314835 | -2.587812 | C | 4.269345  | -2.463944 | -2.551702 |
| H | 5.988549  | -4.229516 | -2.833455 | H | 6.141231  | -4.327249 | -2.668111 |
| C | 7.982396  | -5.315753 | -1.324274 | C | 8.127713  | -5.279783 | -1.062025 |
| H | 7.962061  | -3.809584 | 0.937949  | H | 7.979001  | -3.691462 | 1.140411  |
| H | 2.539269  | 0.755984  | 2.615723  | H | 2.506464  | 0.898679  | 2.498772  |
| H | 3.901675  | 0.760467  | 3.736315  | H | 3.867973  | 0.936270  | 3.619779  |
| H | 3.653460  | -0.606838 | 2.643673  | H | 3.608535  | -0.472391 | 2.577235  |
| H | 5.946369  | 4.847551  | 2.574127  | H | 5.858308  | 4.989235  | 2.251672  |
| H | 5.538589  | 5.374939  | 0.936386  | H | 5.622837  | 5.409823  | 0.549459  |
| H | 7.165856  | 4.793581  | 1.288786  | H | 7.186829  | 4.805198  | 1.094338  |
| H | 6.805574  | 1.522577  | -2.215831 | H | 6.753688  | 1.421814  | -2.371311 |
| H | 5.288795  | 0.641862  | -2.401822 | H | 5.239202  | 0.522031  | -2.494674 |
| H | 6.658462  | -0.138144 | -1.614587 | H | 6.622025  | -0.208085 | -1.684797 |
| H | 3.891397  | -1.263323 | -2.532802 | H | 3.984792  | -1.408509 | -2.577059 |
| H | 3.266545  | -2.905155 | -2.479795 | H | 3.342768  | -3.033331 | -2.403124 |
| H | 4.572116  | -2.500784 | -3.595509 | H | 4.662825  | -2.733615 | -3.537957 |
| H | 7.736056  | -6.205239 | -0.730496 | H | 7.918042  | -6.143563 | -0.418018 |
| H | 9.030173  | -5.070924 | -1.115893 | H | 9.163761  | -4.978927 | -0.866823 |
| H | 7.902450  | -5.590988 | -2.380488 | H | 8.065601  | -5.619612 | -2.100797 |
| C | 6.567928  | -1.770185 | 1.913123  | C | 6.480823  | -1.670917 | 1.991065  |
| H | 6.760170  | -0.697872 | 1.807299  | H | 6.660625  | -0.599557 | 1.855082  |
| H | 5.690050  | -1.874906 | 2.562406  | H | 5.572418  | -1.766076 | 2.598367  |
| H | 7.416554  | -2.217866 | 2.439880  | H | 7.309759  | -2.084707 | 2.574669  |
| C | -6.254301 | -0.265440 | -0.710700 | C | -6.270431 | -0.270682 | -0.736965 |
| C | -7.359208 | 0.374116  | -0.136541 | C | -7.395992 | 0.337990  | -0.166681 |
| H | -7.694483 | 0.073483  | 0.851553  | H | -7.742652 | 0.015348  | 0.810190  |
| C | -8.019287 | 1.385160  | -0.825773 | C | -8.050325 | 1.358228  | -0.845080 |
| H | -8.875215 | 1.871775  | -0.365392 | H | -8.918700 | 1.828063  | -0.391682 |
| C | -7.581547 | 1.785790  | -2.085877 | C | -7.590267 | 1.789565  | -2.088070 |
| C | -6.477278 | 1.155026  | -2.655543 | C | -6.467085 | 1.186711  | -2.652183 |
| H | -6.127643 | 1.451342  | -3.641001 | H | -6.103124 | 1.510527  | -3.623143 |
| C | -5.822066 | 0.130769  | -1.982253 | C | -5.809568 | 0.159331  | -1.988248 |
| H | -4.967261 | -0.364361 | -2.432747 | H | -4.939939 | -0.317223 | -2.429520 |
| C | -6.369088 | -2.251816 | 0.698070  | C | -6.358926 | -2.267093 | 0.662155  |



|   |           |           |           |   |           |           |           |
|---|-----------|-----------|-----------|---|-----------|-----------|-----------|
| C | -6.005298 | -2.630377 | 1.995959  | C | -5.933612 | -2.689085 | 1.928979  |
| H | -5.122772 | -2.189688 | 2.450129  | H | -5.037349 | -2.254209 | 2.360946  |
| C | -6.768230 | -3.560593 | 2.692692  | C | -6.668538 | -3.640678 | 2.625704  |
| H | -6.473319 | -3.843930 | 3.699676  | H | -6.333672 | -3.956796 | 3.609649  |
| C | -7.911392 | -4.111877 | 2.117898  | C | -7.834092 | -4.172741 | 2.078297  |
| C | -8.281213 | -3.727321 | 0.830787  | C | -8.261133 | -3.746224 | 0.820792  |
| H | -9.167570 | -4.153215 | 0.367939  | H | -9.164473 | -4.161267 | 0.382514  |
| C | -7.514795 | -2.810944 | 0.119763  | C | -7.531013 | -2.802631 | 0.110659  |
| H | -7.796960 | -2.520264 | -0.887899 | H | -7.852942 | -2.482211 | -0.875514 |
| N | -5.594781 | -1.308562 | -0.018598 | N | -5.602396 | -1.313807 | -0.055324 |
| H | -8.095790 | 2.580380  | -2.619067 | H | -8.102838 | 2.590443  | -2.612976 |
| H | -8.509124 | -4.832944 | 2.668147  | H | -8.407714 | -4.913475 | 2.627659  |

**Table S7** Cartesian coordinates of complex **3** at the  $S_0$  and  $T_1$  optimized geometries.

| $S_0$ |           |           |           | $T_1$ |           |           |           |
|-------|-----------|-----------|-----------|-------|-----------|-----------|-----------|
| Pt    | -0.785298 | 1.031098  | -0.066996 | Pt    | -0.792107 | 1.030349  | -0.070279 |
| N     | 0.685038  | -0.502445 | 0.100899  | N     | 0.666764  | -0.485132 | 0.066773  |
| C     | 2.009677  | -0.345236 | 0.066524  | C     | 1.980127  | -0.343812 | 0.041509  |
| H     | 2.359663  | 0.680351  | 0.051461  | H     | 2.346185  | 0.676479  | 0.026014  |
| C     | 2.943765  | -1.386451 | 0.018393  | C     | 2.930497  | -1.394673 | -0.000643 |
| C     | 2.400027  | -2.684943 | -0.009494 | C     | 2.373243  | -2.711008 | -0.032581 |
| H     | 3.068704  | -3.542083 | -0.048142 | H     | 3.042028  | -3.567491 | -0.057965 |
| C     | 1.033113  | -2.872489 | 0.006640  | C     | 1.017038  | -2.889390 | -0.022921 |
| H     | 0.616483  | -3.873063 | -0.031586 | H     | 0.599240  | -3.890825 | -0.055072 |
| C     | 0.170497  | -1.766235 | 0.047757  | C     | 0.137151  | -1.775435 | 0.011483  |
| C     | -1.273724 | -1.825820 | 0.022056  | C     | -1.270038 | -1.831148 | -0.050959 |
| C     | -1.989452 | -3.027607 | 0.129739  | C     | -2.010686 | -3.052774 | -0.027841 |
| H     | -1.466678 | -3.978924 | 0.189416  | H     | -1.492930 | -4.006451 | -0.053875 |
| C     | -3.369481 | -3.031372 | 0.163809  | C     | -3.374594 | -3.038542 | 0.039286  |
| H     | -3.919262 | -3.964391 | 0.231404  | H     | -3.937521 | -3.966980 | 0.042451  |
| C     | -4.060902 | -1.808492 | 0.121511  | C     | -4.073864 | -1.796347 | 0.071209  |
| C     | -3.343015 | -0.609059 | 0.017989  | C     | -3.351166 | -0.586324 | -0.014187 |
| H     | -3.903295 | 0.317329  | 0.041167  | H     | -3.911338 | 0.338917  | 0.046258  |
| C     | -1.949365 | -0.576522 | -0.072954 | C     | -1.971566 | -0.549695 | -0.112650 |
| N     | -5.466343 | -1.788560 | 0.179314  | N     | -5.466069 | -1.797798 | 0.151924  |
| C     | -6.193949 | -0.834378 | -0.571241 | C     | -6.220006 | -0.821278 | -0.541155 |
| C     | -7.265780 | -0.145652 | 0.007658  | C     | -7.296602 | -0.181388 | 0.084621  |
| H     | -7.525147 | -0.340374 | 1.044003  | H     | -7.540725 | -0.427503 | 1.113544  |
| C     | -7.986531 | 0.780626  | -0.737746 | C     | -8.031943 | 0.772450  | -0.608033 |
| H     | -8.813762 | 1.310269  | -0.272661 | H     | -8.859950 | 1.270893  | -0.111857 |

|   |           |           |           |   |           |           |           |
|---|-----------|-----------|-----------|---|-----------|-----------|-----------|
| C | -7.643648 | 1.045099  | -2.061831 | C | -7.702853 | 1.102376  | -1.921625 |
| H | -8.206011 | 1.773293  | -2.639384 | H | -8.279530 | 1.850539  | -2.457675 |
| C | -6.573856 | 0.363279  | -2.638893 | C | -6.629905 | 0.465361  | -2.543469 |
| H | -6.300782 | 0.551441  | -3.673975 | H | -6.370640 | 0.707989  | -3.570252 |
| C | -5.857467 | -0.576814 | -1.905957 | C | -5.890784 | -0.494427 | -1.862746 |
| H | -5.030910 | -1.116071 | -2.359447 | H | -5.060323 | -1.001004 | -2.345246 |
| C | -6.167939 | -2.713542 | 0.984798  | C | -6.133557 | -2.755871 | 0.943504  |
| C | -5.694911 | -3.051198 | 2.259269  | C | -5.591145 | -3.152060 | 2.174020  |
| H | -4.782770 | -2.591078 | 2.627258  | H | -4.671254 | -2.692444 | 2.522418  |
| C | -6.390294 | -3.963718 | 3.044237  | C | -6.243071 | -4.108116 | 2.943386  |
| H | -6.010178 | -4.213476 | 4.031392  | H | -5.817324 | -4.403314 | 3.898304  |
| C | -7.573062 | -4.539190 | 2.584700  | C | -7.441176 | -4.670226 | 2.507362  |
| H | -8.117294 | -5.245807 | 3.204705  | H | -7.949660 | -5.413468 | 3.114422  |
| C | -8.050594 | -4.196126 | 1.321779  | C | -7.984573 | -4.269452 | 1.286955  |
| H | -8.968796 | -4.640656 | 0.946748  | H | -8.914438 | -4.707317 | 0.934728  |
| C | -7.353497 | -3.298259 | 0.521842  | C | -7.338553 | -3.322596 | 0.503971  |
| H | -7.722251 | -3.041939 | -0.466788 | H | -7.752560 | -3.022570 | -0.453682 |
| N | 0.338463  | 2.857010  | 0.328639  | N | 4.441630  | -1.090895 | -0.003262 |
| C | -2.098549 | 2.410172  | -0.651759 | C | 5.452869  | -2.213040 | -0.486834 |
| C | -3.360697 | 2.396415  | -1.324575 | C | 4.936290  | 0.332672  | 0.502000  |
| H | -3.926479 | 1.503235  | -1.560959 | H | 5.320944  | -2.800691 | -1.769555 |
| C | -3.811995 | 3.636349  | -1.685791 | C | 6.220148  | -3.782454 | -2.192659 |
| H | -4.737292 | 3.881131  | -2.192489 | H | 7.255744  | -4.235099 | -1.380166 |
| S | -2.718598 | 4.890504  | -1.250036 | S | 7.386401  | -3.656236 | -0.118700 |
| C | -1.634727 | 3.716531  | -0.571147 | C | 6.520339  | -2.660298 | 0.331701  |
| C | -0.349679 | 3.987667  | 0.002003  | C | 4.630055  | 0.786889  | 1.806980  |
| C | 0.187376  | 5.256654  | 0.255307  | C | 5.098964  | 2.028280  | 2.251148  |
| H | -0.377897 | 6.138893  | -0.028819 | H | 5.856325  | 2.865425  | 1.436509  |
| C | 1.417425  | 5.367919  | 0.879839  | C | 6.145950  | 2.422324  | 0.145471  |
| H | 1.842555  | 6.347654  | 1.080025  | H | 5.712984  | 1.183536  | -0.324040 |
| C | 2.088317  | 4.208805  | 1.265146  | C | 4.243135  | -2.383231 | -2.740133 |
| H | 3.046420  | 4.234636  | 1.772026  | H | 6.109233  | -4.200845 | -3.192461 |
| C | 1.502723  | 2.986208  | 0.973496  | C | 8.192822  | -5.317616 | -1.838292 |
| H | 1.991457  | 2.067987  | 1.276988  | H | 8.193367  | -3.985791 | 0.534851  |
| B | 4.475882  | -1.093784 | 0.010526  | B | 6.740156  | -2.110576 | 1.717505  |
| C | 5.458947  | -2.199851 | -0.536075 | C | 3.822567  | -0.037500 | 2.781978  |
| C | 4.972645  | 0.299020  | 0.568846  | C | 4.877101  | 2.340098  | 3.271692  |
| C | 5.284607  | -2.755551 | -1.826286 | C | 6.365892  | 4.191406  | 1.930570  |
| C | 6.161186  | -3.739179 | -2.289860 | C | 6.734286  | 3.058504  | -0.514774 |
| C | 7.204289  | -4.225911 | -1.507518 | C | 3.282556  | -2.860656 | -2.510347 |
| C | 7.373773  | -3.675965 | -0.236895 | C | 4.514241  | -2.666533 | -3.762789 |
| C | 6.539118  | -2.672742 | 0.251918  | C | 4.065330  | -1.303608 | -2.726001 |
| C | 4.655525  | 0.710390  | 1.883273  | C | 8.201255  | -5.404481 | -2.929708 |
| C | 5.106921  | 1.945702  | 2.359851  | C | 7.898095  | -6.295225 | -1.434451 |

|   |          |           |           |   |           |           |           |
|---|----------|-----------|-----------|---|-----------|-----------|-----------|
| C | 5.850820 | 2.814049  | 1.566655  | C | 9.219107  | -5.127773 | -1.504876 |
| C | 6.151025 | 2.409228  | 0.264530  | C | 7.651478  | -2.524977 | 2.160832  |
| C | 5.741873 | 1.176295  | -0.237375 | C | 5.908690  | -2.363316 | 2.387306  |
| C | 4.196266 | -2.301647 | -2.770704 | C | 6.828002  | -1.019931 | 1.714327  |
| H | 6.024770 | -4.132670 | -3.296327 | H | 3.997818  | -1.110408 | 2.665187  |
| C | 8.112767 | -5.314024 | -2.006582 | C | 2.742270  | 0.114239  | 2.654801  |
| H | 8.189715 | -4.033056 | 0.389840  | H | 4.067303  | 0.236384  | 3.814039  |
| C | 6.812073 | -2.138598 | 1.635272  | C | 6.068812  | 5.009602  | 1.263156  |
| C | 3.864415 | -0.149353 | 2.842235  | C | 7.461785  | 4.203346  | 1.980978  |
| H | 4.878037 | 2.228468  | 3.386953  | H | 5.986917  | 4.418075  | 2.932532  |
| C | 6.338585 | 4.135007  | 2.093565  | C | 6.059079  | 0.795986  | -1.738029 |
| H | 6.729658 | 3.072205  | -0.377064 | H | 6.531944  | -0.190072 | -1.783664 |
| H | 3.279621 | -2.891182 | -2.645968 | H | 5.162448  | 0.751683  | -2.369214 |
| H | 4.518998 | -2.421587 | -3.810344 | H | 6.740096  | 1.524499  | -2.189806 |
| H | 3.917882 | -1.254058 | -2.627757 | H | 0.339294  | 2.840255  | 0.348014  |
| H | 8.095999 | -5.380996 | -3.098996 | H | -2.111642 | 2.427533  | -0.614984 |
| H | 7.808546 | -6.292686 | -1.613142 | H | -3.379791 | 2.438227  | -1.277631 |
| H | 9.148492 | -5.147544 | -1.691136 | H | -3.949238 | 1.553411  | -1.535405 |
| H | 7.681368 | -2.635990 | 2.076671  | H | -3.829222 | 3.688150  | -1.604457 |
| H | 5.965611 | -2.301679 | 2.313063  | H | -4.756599 | 3.950564  | -2.098412 |
| H | 7.007805 | -1.061752 | 1.622645  | H | -2.725127 | 4.925582  | -1.148079 |
| H | 3.893748 | -1.211142 | 2.586307  | H | -1.640782 | 3.729742  | -0.509009 |
| H | 2.805323 | 0.139370  | 2.867546  | H | -0.346612 | 3.981502  | 0.051184  |
| H | 4.250288 | -0.039575 | 3.861739  | H | 0.200339  | 5.243442  | 0.316082  |
| H | 6.054380 | 4.959883  | 1.429391  | H | -0.365809 | 6.132399  | 0.055388  |
| H | 7.432705 | 4.150816  | 2.171982  | H | 1.441590  | 5.339233  | 0.919823  |
| H | 5.932655 | 4.345109  | 3.088222  | H | 1.876034  | 6.313166  | 1.127784  |
| C | 6.105847 | 0.826218  | -1.657450 | C | 2.112538  | 4.169827  | 1.273395  |
| H | 6.632568 | -0.131450 | -1.716660 | H | 3.081562  | 4.180080  | 1.759330  |
| H | 5.216047 | 0.743781  | -2.294073 | H | 1.516563  | 2.954775  | 0.975104  |
| H | 6.747665 | 1.596287  | -2.096570 | H | 2.007216  | 2.031763  | 1.256798  |

**Table S8** Cartesian coordinates of complex **4** at the S<sub>0</sub> and T<sub>1</sub> optimized geometries.

| S <sub>0</sub> |           |           |           | T <sub>1</sub> |           |           |           |
|----------------|-----------|-----------|-----------|----------------|-----------|-----------|-----------|
| Pt             | -0.674369 | 0.945498  | -0.151152 | Pt             | -0.673453 | 0.928988  | -0.169790 |
| N              | 0.672900  | -0.531928 | -0.041321 | N              | 0.688960  | -0.540543 | -0.047381 |
| C              | 1.986958  | -0.295379 | 0.041106  | C              | 2.004380  | -0.306709 | 0.026235  |
| H              | 2.258262  | 0.754857  | 0.105678  | H              | 2.284304  | 0.741833  | 0.066744  |
| C              | 2.951330  | -1.308325 | 0.027827  | C              | 2.970554  | -1.316246 | 0.037457  |
| C              | 2.457613  | -2.624146 | -0.076764 | C              | 2.479234  | -2.637153 | -0.028572 |
| H              | 3.161741  | -3.452847 | -0.096270 | H              | 3.184092  | -3.465361 | -0.025205 |
| C              | 1.100247  | -2.874181 | -0.146707 | C              | 1.121806  | -2.887694 | -0.087952 |
| H              | 0.727434  | -3.890585 | -0.215923 | H              | 0.748260  | -3.905606 | -0.126451 |
| C              | 0.194934  | -1.806484 | -0.132564 | C              | 0.214995  | -1.820790 | -0.101016 |
| C              | -1.247906 | -1.875475 | -0.170745 | C              | -1.226241 | -1.890972 | -0.135038 |
| C              | -1.968473 | -3.076709 | -0.171118 | C              | -1.952563 | -3.088715 | -0.109533 |
| H              | -1.449657 | -4.030646 | -0.230683 | H              | -1.437610 | -4.045952 | -0.143432 |
| C              | -3.349414 | -3.074386 | -0.108367 | C              | -3.333296 | -3.077990 | -0.053820 |
| H              | -3.907018 | -4.004698 | -0.135450 | H              | -3.893556 | -4.007144 | -0.058903 |
| C              | -4.028206 | -1.849698 | 0.005346  | C              | -4.012456 | -1.849260 | 0.019500  |
| C              | -3.298781 | -0.652030 | 0.020502  | C              | -3.281779 | -0.652181 | 0.002367  |
| H              | -3.858747 | 0.261536  | 0.183177  | H              | -3.833735 | 0.273297  | 0.116226  |
| C              | -1.912166 | -0.613951 | -0.124024 | C              | -1.893429 | -0.630740 | -0.123291 |
| N              | -5.431474 | -1.816702 | 0.097408  | N              | -5.415591 | -1.815463 | 0.100250  |
| C              | -6.153949 | -0.753766 | -0.493389 | C              | -6.136162 | -0.773652 | -0.531386 |
| C              | -7.210552 | -0.142893 | 0.192136  | C              | -7.192505 | -0.137830 | 0.130729  |
| H              | -7.470363 | -0.490345 | 1.187618  | H              | -7.451577 | -0.446702 | 1.139073  |
| C              | -7.916089 | 0.901418  | -0.395991 | C              | -7.898272 | 0.882606  | -0.497295 |
| H              | -8.732238 | 1.365948  | 0.151080  | H              | -8.713960 | 1.368694  | 0.031375  |
| C              | -7.573857 | 1.362958  | -1.665143 | C              | -7.555356 | 1.294690  | -1.783093 |
| H              | -8.126412 | 2.180315  | -2.119876 | H              | -8.106132 | 2.095666  | -2.268037 |
| C              | -6.521440 | 0.756090  | -2.349845 | C              | -6.502229 | 0.663594  | -2.443629 |
| H              | -6.252870 | 1.092919  | -3.347809 | H              | -6.230752 | 0.965369  | -3.451813 |
| C              | -5.821652 | -0.299765 | -1.776834 | C              | -5.802550 | -0.369487 | -1.830337 |
| H              | -5.010477 | -0.779454 | -2.316429 | H              | -4.989774 | -0.868195 | -2.350002 |
| C              | -6.131625 | -2.827560 | 0.795957  | C              | -6.120948 | -2.808084 | 0.818449  |
| C              | -5.647174 | -3.314070 | 2.016262  | C              | -5.645090 | -3.266448 | 2.053170  |
| H              | -4.729344 | -2.903299 | 2.426352  | H              | -4.729258 | -2.847503 | 2.459435  |
| C              | -6.336633 | -4.313209 | 2.693711  | C              | -6.341128 | -4.247181 | 2.750443  |
| H              | -5.947419 | -4.680070 | 3.639827  | H              | -5.958496 | -4.591598 | 3.707644  |
| C              | -7.524663 | -4.828376 | 2.179651  | C              | -7.527594 | -4.771770 | 2.242266  |
| H              | -8.064109 | -5.604027 | 2.715562  | H              | -8.072306 | -5.532675 | 2.793771  |
| C              | -8.013869 | -4.336892 | 0.971344  | C              | -8.008388 | -4.308133 | 1.019681  |
| H              | -8.936134 | -4.733258 | 0.554757  | H              | -8.929518 | -4.711719 | 0.607485  |
| C              | -7.322324 | -3.350624 | 0.277375  | C              | -7.310321 | -3.340703 | 0.306134  |
| H              | -7.698686 | -2.979850 | -0.671520 | H              | -7.680760 | -2.991424 | -0.653135 |

|   |           |           |           |   |           |           |           |
|---|-----------|-----------|-----------|---|-----------|-----------|-----------|
| B | 4.477934  | -0.971944 | 0.100887  | B | 4.492114  | -0.964493 | 0.095792  |
| C | 5.501254  | -2.073109 | -0.381794 | C | 5.528298  | -2.065548 | -0.360893 |
| C | 4.929019  | 0.436668  | 0.646231  | C | 4.922671  | 0.468003  | 0.601815  |
| C | 5.429672  | -2.626508 | -1.679633 | C | 5.453714  | -2.649333 | -1.646521 |
| C | 6.342635  | -3.608399 | -2.075300 | C | 6.375420  | -3.628229 | -2.027083 |
| C | 7.322703  | -4.091872 | -1.215340 | C | 7.367926  | -4.081550 | -1.164069 |
| C | 7.386998  | -3.547105 | 0.068741  | C | 7.436098  | -3.506507 | 0.105737  |
| C | 6.513838  | -2.548011 | 0.491026  | C | 6.553484  | -2.508644 | 0.512908  |
| C | 4.495672  | 0.913887  | 1.904729  | C | 4.504798  | 0.955178  | 1.862724  |
| C | 4.899807  | 2.173504  | 2.355149  | C | 4.886193  | 2.231298  | 2.283573  |
| C | 5.706963  | 3.006070  | 1.588373  | C | 5.659462  | 3.070091  | 1.486910  |
| C | 6.134782  | 2.532618  | 0.346694  | C | 6.062839  | 2.590841  | 0.240390  |
| C | 5.776486  | 1.273630  | -0.126615 | C | 5.724098  | 1.315079  | -0.205466 |
| C | 4.413822  | -2.178948 | -2.704531 | C | 4.422725  | -2.236655 | -2.670826 |
| H | 6.284708  | -4.002130 | -3.089388 | H | 6.315025  | -4.044483 | -3.031888 |
| C | 8.285064  | -5.163315 | -1.645401 | C | 8.337557  | -5.152839 | -1.577653 |
| H | 8.148733  | -3.906353 | 0.759458  | H | 8.208769  | -3.838797 | 0.797769  |
| C | 6.663601  | -2.015696 | 1.893800  | C | 6.705777  | -1.948700 | 1.904199  |
| C | 3.622278  | 0.106726  | 2.836306  | C | 3.665178  | 0.140140  | 2.818357  |
| H | 4.569139  | 2.511137  | 3.336474  | H | 4.568059  | 2.577197  | 3.266293  |
| C | 6.102443  | 4.373908  | 2.069119  | C | 6.077958  | 4.432792  | 1.963570  |
| H | 6.772576  | 3.164111  | -0.270198 | H | 6.665274  | 3.229513  | -0.404006 |
| H | 3.558123  | -2.864919 | -2.747623 | H | 3.530112  | -2.872855 | -2.622700 |
| H | 4.861405  | -2.160057 | -3.704391 | H | 4.830884  | -2.327928 | -3.683190 |
| H | 4.010579  | -1.183864 | -2.501528 | H | 4.081776  | -1.206136 | -2.541486 |
| H | 8.180633  | -5.391441 | -2.710621 | H | 8.248107  | -5.384199 | -2.643548 |
| H | 8.118479  | -6.093361 | -1.087577 | H | 8.163362  | -6.081712 | -1.020041 |
| H | 9.323812  | -4.862916 | -1.464542 | H | 9.373275  | -4.851290 | -1.382647 |
| H | 7.487757  | -2.515765 | 2.412295  | H | 7.584758  | -2.373213 | 2.399392  |
| H | 5.757629  | -2.174539 | 2.491332  | H | 5.836364  | -2.178084 | 2.532971  |
| H | 6.861908  | -0.939172 | 1.897885  | H | 6.813228  | -0.859740 | 1.892523  |
| H | 3.642705  | -0.964628 | 2.623348  | H | 3.779714  | -0.937428 | 2.674806  |
| H | 2.574648  | 0.428417  | 2.775878  | H | 2.597289  | 0.366691  | 2.705806  |
| H | 3.942028  | 0.246917  | 3.874981  | H | 3.935448  | 0.369165  | 3.854975  |
| H | 5.559784  | 5.155607  | 1.522248  | H | 6.049641  | 5.167444  | 1.151343  |
| H | 7.171913  | 4.558670  | 1.916444  | H | 7.105816  | 4.418002  | 2.348776  |
| H | 5.883592  | 4.503695  | 3.133538  | H | 5.431169  | 4.791581  | 2.770650  |
| C | 6.289188  | 0.857417  | -1.482313 | C | 6.194923  | 0.896888  | -1.575141 |
| H | 6.899138  | -0.049816 | -1.426216 | H | 6.736633  | -0.053444 | -1.548418 |
| H | 5.471592  | 0.651436  | -2.183247 | H | 5.355228  | 0.769920  | -2.269777 |
| H | 6.901309  | 1.650702  | -1.922855 | H | 6.857517  | 1.654493  | -2.005242 |
| O | 0.759624  | 2.438488  | -0.010435 | O | 0.730802  | 2.478348  | -0.003977 |
| N | -1.863994 | 2.582791  | -0.412830 | N | -1.877387 | 2.537104  | -0.421381 |
| C | -3.140905 | 2.639185  | -0.762237 | C | -3.192170 | 2.618816  | -0.842263 |

|   |           |          |           |   |           |          |           |
|---|-----------|----------|-----------|---|-----------|----------|-----------|
| H | -3.638471 | 1.699205 | -0.956757 | H | -3.649465 | 1.688291 | -1.147952 |
| C | -3.834736 | 3.854155 | -0.890923 | C | -3.875295 | 3.799968 | -0.907751 |
| H | -4.883857 | 3.824594 | -1.166801 | H | -4.909541 | 3.780591 | -1.237334 |
| C | -3.179467 | 5.038360 | -0.657152 | C | -3.242344 | 5.023892 | -0.577106 |
| H | -3.700882 | 5.989309 | -0.736690 | H | -3.775559 | 5.967937 | -0.618965 |
| C | -1.802700 | 5.028064 | -0.333917 | C | -1.872437 | 4.986936 | -0.255724 |
| C | -1.026592 | 6.188611 | -0.125883 | C | -1.077179 | 6.131587 | 0.010678  |
| H | -1.497933 | 7.165228 | -0.183812 | H | -1.558701 | 7.106171 | -0.001000 |
| C | 0.324227  | 6.056875 | 0.132305  | C | 0.309418  | 6.045336 | 0.282020  |
| H | 0.924335  | 6.950357 | 0.287944  | H | 0.866385  | 6.956219 | 0.481617  |
| C | 0.958057  | 4.806541 | 0.185500  | C | 0.942180  | 4.830794 | 0.289614  |
| H | 2.025776  | 4.727927 | 0.366866  | H | 2.003432  | 4.717770 | 0.487327  |
| C | 0.232742  | 3.629883 | -0.007832 | C | 0.173242  | 3.638048 | 0.028935  |
| C | -1.172992 | 3.757480 | -0.240571 | C | -1.225651 | 3.723880 | -0.208199 |

**Table S9** Cartesian coordinates of complex **5** at the  $S_0$  and  $T_1$  optimized geometries.

| $S_0$ |           |           |           | $T_1$ |           |           |           |
|-------|-----------|-----------|-----------|-------|-----------|-----------|-----------|
| C     | -2.044462 | -5.517616 | -0.012965 | C     | -2.132659 | -5.467767 | -0.123142 |
| C     | -2.188507 | -4.133015 | -0.014618 | C     | -2.250231 | -4.091170 | -0.081841 |
| H     | -3.179307 | -3.690375 | -0.064438 | H     | -3.228378 | -3.619830 | -0.106495 |
| C     | -1.066043 | -3.300310 | 0.036819  | C     | -1.108167 | -3.276977 | -0.011293 |
| C     | 0.212206  | -3.912795 | 0.076277  | C     | 0.218928  | -3.911593 | -0.005638 |
| C     | 0.351349  | -5.306726 | 0.080049  | C     | 0.307301  | -5.328172 | -0.038247 |
| H     | 1.336433  | -5.766381 | 0.112534  | H     | 1.275432  | -5.819935 | -0.024733 |
| C     | -0.778479 | -6.109078 | 0.038148  | C     | -0.842952 | -6.075187 | -0.095690 |
| H     | -0.679299 | -7.190829 | 0.040192  | H     | -0.772222 | -7.159744 | -0.125684 |
| C     | 1.320747  | -2.977814 | 0.096506  | C     | 1.302325  | -3.020042 | 0.029243  |
| C     | 2.683591  | -3.285243 | 0.142150  | C     | 2.689929  | -3.326953 | 0.044611  |
| H     | 2.992616  | -4.324655 | 0.174867  | H     | 2.993330  | -4.369674 | 0.035318  |
| C     | 3.621746  | -2.268876 | 0.146652  | C     | 3.624561  | -2.330526 | 0.078447  |
| H     | 4.681918  | -2.508714 | 0.181107  | H     | 4.683269  | -2.573300 | 0.103977  |
| C     | 3.222876  | -0.919484 | 0.120369  | C     | 3.231542  | -0.949507 | 0.101085  |
| C     | 1.844484  | -0.690322 | 0.082062  | C     | 1.834357  | -0.715738 | 0.088406  |
| H     | 1.438309  | 0.316296  | 0.064952  | H     | 1.448700  | 0.299263  | 0.102380  |
| N     | 0.931240  | -1.667619 | 0.063664  | N     | 0.919902  | -1.667243 | 0.053202  |
| B     | 4.230006  | 0.280071  | 0.148441  | B     | 4.215406  | 0.241292  | 0.137552  |
| C     | 3.698384  | 1.695347  | 0.600144  | C     | 3.666046  | 1.676991  | 0.533119  |
| C     | 5.726763  | 0.010343  | -0.267721 | C     | 5.738610  | -0.017274 | -0.211949 |
| C     | 3.039922  | 1.872118  | 1.839386  | C     | 2.996456  | 1.898140  | 1.759470  |
| C     | 2.559800  | 3.132465  | 2.205002  | C     | 2.517335  | 3.171782  | 2.084252  |

|    |           |           |           |    |           |           |           |
|----|-----------|-----------|-----------|----|-----------|-----------|-----------|
| C  | 2.685715  | 4.239871  | 1.371375  | C  | 2.661391  | 4.255385  | 1.223757  |
| C  | 3.328325  | 4.059967  | 0.145564  | C  | 3.316491  | 4.035192  | 0.010904  |
| C  | 3.845461  | 2.826256  | -0.243380 | C  | 3.824715  | 2.785919  | -0.338234 |
| C  | 6.048494  | -0.577986 | -1.512874 | C  | 6.120259  | -0.601567 | -1.443421 |
| C  | 7.382212  | -0.823965 | -1.848433 | C  | 7.469667  | -0.822509 | -1.731232 |
| C  | 8.427171  | -0.531891 | -0.977548 | C  | 8.478448  | -0.504485 | -0.826994 |
| C  | 8.106417  | 0.049299  | 0.250092  | C  | 8.101555  | 0.072153  | 0.385935  |
| C  | 6.792007  | 0.336371  | 0.610753  | C  | 6.767992  | 0.327897  | 0.699993  |
| C  | 2.844324  | 0.751034  | 2.832921  | C  | 2.779460  | 0.805898  | 2.779635  |
| H  | 2.076320  | 3.249594  | 3.174131  | H  | 2.026152  | 3.319205  | 3.045739  |
| C  | 2.180976  | 5.592891  | 1.788086  | C  | 2.159664  | 5.623633  | 1.593456  |
| H  | 3.436855  | 4.910748  | -0.525591 | H  | 3.441421  | 4.866371  | -0.682128 |
| C  | 4.521369  | 2.733314  | -1.587996 | C  | 4.505307  | 2.647453  | -1.675649 |
| C  | 5.002166  | -0.930539 | -2.544261 | C  | 5.114993  | -0.983924 | -2.502590 |
| H  | 7.608421  | -1.253704 | -2.823425 | H  | 7.738284  | -1.251919 | -2.695838 |
| C  | 9.854481  | -0.834337 | -1.337755 | C  | 9.923126  | -0.781169 | -1.136509 |
| H  | 8.908004  | 0.295877  | 0.944858  | H  | 8.872167  | 0.338569  | 1.108350  |
| H  | 1.844384  | 0.307667  | 2.743304  | H  | 1.785754  | 0.350141  | 2.674568  |
| H  | 2.937881  | 1.128517  | 3.857093  | H  | 2.839328  | 1.211056  | 3.795999  |
| H  | 3.566391  | -0.060242 | 2.711095  | H  | 3.511029  | -0.001409 | 2.694664  |
| H  | 1.427823  | 5.514557  | 2.578485  | H  | 1.496874  | 5.586078  | 2.463848  |
| H  | 1.734861  | 6.131188  | 0.944809  | H  | 1.607133  | 6.085177  | 0.766827  |
| H  | 2.997962  | 6.216616  | 2.173387  | H  | 2.990208  | 6.297591  | 1.839491  |
| H  | 4.550856  | 3.713269  | -2.074379 | H  | 4.586216  | 3.618736  | -2.174194 |
| H  | 3.992742  | 2.050809  | -2.264688 | H  | 3.945929  | 1.982454  | -2.345519 |
| H  | 5.548730  | 2.365798  | -1.501572 | H  | 5.511737  | 2.228772  | -1.577969 |
| H  | 4.100657  | -0.317503 | -2.464609 | H  | 4.245429  | -0.320577 | -2.513951 |
| H  | 4.682946  | -1.976457 | -2.454751 | H  | 4.731666  | -2.000717 | -2.348481 |
| H  | 5.403588  | -0.801588 | -3.555156 | H  | 5.572790  | -0.956703 | -3.497292 |
| H  | 10.229465 | -1.697158 | -0.772615 | H  | 10.270899 | -1.688555 | -0.625617 |
| H  | 10.513105 | 0.010847  | -1.108027 | H  | 10.568573 | 0.040643  | -0.806852 |
| H  | 9.958964  | -1.066220 | -2.402174 | H  | 10.082097 | -0.927932 | -2.209657 |
| C  | 6.548439  | 0.973518  | 1.955495  | C  | 6.462723  | 0.953109  | 2.037215  |
| H  | 6.049623  | 1.943108  | 1.859008  | H  | 5.934880  | 1.906026  | 1.928628  |
| H  | 5.913544  | 0.350659  | 2.597013  | H  | 5.826807  | 0.305443  | 2.652737  |
| H  | 7.492938  | 1.129205  | 2.486214  | H  | 7.383751  | 1.136586  | 2.599933  |
| Pt | -1.031386 | -1.339867 | 0.050404  | Pt | -1.038009 | -1.355244 | 0.071246  |
| N  | -5.351772 | 1.426941  | -0.240845 | N  | -5.334518 | 1.452409  | -0.217023 |
| N  | -4.961012 | 0.132275  | -0.033007 | N  | -4.958847 | 0.153260  | 0.001526  |
| O  | -3.039798 | -1.142672 | 0.096241  | O  | -3.055458 | -1.143843 | 0.147851  |
| O  | -0.809931 | 0.760013  | 0.070930  | O  | -0.803242 | 0.730398  | 0.126723  |
| C  | -1.710002 | 1.641641  | -0.032839 | C  | -1.695594 | 1.624921  | 0.018336  |
| C  | -1.216994 | 3.059070  | 0.058674  | C  | -1.182363 | 3.031925  | 0.120388  |
| H  | -0.319601 | 3.068508  | 0.683438  | H  | -0.302404 | 3.029667  | 0.769842  |

|   |           |           |           |   |           |           |           |
|---|-----------|-----------|-----------|---|-----------|-----------|-----------|
| H | -1.967612 | 3.742822  | 0.457796  | H | -1.932868 | 3.731191  | 0.490981  |
| C | -3.079745 | 1.317916  | -0.191018 | C | -3.064643 | 1.316435  | -0.153788 |
| C | -3.600925 | -0.002977 | -0.034297 | C | -3.603483 | 0.002040  | 0.006686  |
| C | -4.255449 | 2.139363  | -0.336300 | C | -4.230611 | 2.151961  | -0.310192 |
| C | -4.393965 | 3.580688  | -0.612627 | C | -4.347915 | 3.592814  | -0.596091 |
| C | -5.302389 | 4.343595  | 0.129689  | C | -5.257316 | 4.370213  | 0.129730  |
| H | -5.861609 | 3.862712  | 0.926621  | H | -5.832875 | 3.901108  | 0.922003  |
| C | -5.486087 | 5.693042  | -0.152919 | C | -5.420116 | 5.720075  | -0.163034 |
| H | -6.190791 | 6.275418  | 0.434660  | H | -6.125074 | 6.314770  | 0.411600  |
| C | -4.770262 | 6.296625  | -1.184271 | C | -4.682729 | 6.308367  | -1.188012 |
| H | -4.913955 | 7.351057  | -1.404409 | H | -4.810119 | 7.363192  | -1.415850 |
| C | -3.874710 | 5.540967  | -1.938123 | C | -3.785953 | 5.537915  | -1.925270 |
| H | -3.326460 | 6.001056  | -2.755968 | H | -3.220417 | 5.986803  | -2.737398 |
| C | -3.689114 | 4.191819  | -1.655990 | C | -3.620428 | 4.188447  | -1.632836 |
| H | -3.011387 | 3.596717  | -2.262351 | H | -2.940629 | 3.582111  | -2.225605 |
| C | -5.949590 | -0.872547 | 0.067903  | C | -5.959112 | -0.840805 | 0.101245  |
| C | -7.197050 | -0.644204 | -0.517602 | C | -7.192397 | -0.611498 | -0.512493 |
| H | -7.371010 | 0.292335  | -1.034892 | H | -7.348456 | 0.317643  | -1.048553 |
| C | -8.190177 | -1.610814 | -0.417271 | C | -8.195181 | -1.568469 | -0.415567 |
| H | -9.158145 | -1.427230 | -0.875800 | H | -9.152526 | -1.385203 | -0.895751 |
| C | -7.950786 | -2.805648 | 0.257687  | C | -7.978580 | -2.753524 | 0.283943  |
| H | -8.729035 | -3.560216 | 0.329663  | H | -8.764536 | -3.500192 | 0.353518  |
| C | -6.707163 | -3.020869 | 0.844582  | C | -6.748965 | -2.969078 | 0.899624  |
| H | -6.511415 | -3.942651 | 1.385859  | H | -6.572807 | -3.882342 | 1.461576  |
| C | -5.703875 | -2.060205 | 0.761394  | C | -5.736564 | -2.017686 | 0.820093  |
| H | -4.742645 | -2.224734 | 1.231712  | H | -4.787138 | -2.180103 | 1.314853  |
| H | -0.929040 | 3.420152  | -0.935536 | H | -0.854801 | 3.378954  | -0.866751 |
| H | -2.929225 | -6.149061 | -0.054009 | H | -3.016433 | -6.096516 | -0.177147 |



**Table S10** Cartesian coordinates of complex **6** at the  $S_0$  and  $T_1$  optimized geometries.

| $S_0$ |           |           |           | $T_1$ |           |           |           |
|-------|-----------|-----------|-----------|-------|-----------|-----------|-----------|
| C     | -3.237231 | -5.146732 | -0.084188 | C     | -3.368359 | -5.054461 | -0.166113 |
| C     | -3.319954 | -3.758817 | -0.150945 | C     | -3.403274 | -3.675890 | -0.236926 |
| H     | -4.273168 | -3.303194 | -0.388967 | H     | -4.330821 | -3.178269 | -0.491247 |
| C     | -2.198868 | -2.944546 | 0.057308  | C     | -2.255875 | -2.897645 | 0.013869  |
| C     | -0.957934 | -3.611233 | 0.258948  | C     | -0.981695 | -3.602357 | 0.215604  |
| C     | -0.882602 | -5.008609 | 0.338024  | C     | -0.988744 | -5.015195 | 0.346476  |
| H     | 0.073782  | -5.499213 | 0.500979  | H     | -0.066808 | -5.546750 | 0.561745  |
| C     | -2.022646 | -5.780134 | 0.182048  | C     | -2.153779 | -5.716759 | 0.158532  |
| H     | -1.964542 | -6.863236 | 0.241156  | H     | -2.143468 | -6.801226 | 0.235624  |
| C     | 0.221041  | -2.761855 | 0.290642  | C     | 0.181257  | -2.807213 | 0.238011  |
| C     | 1.535773  | -3.181920 | 0.529536  | C     | 1.521156  | -3.252494 | 0.393741  |
| H     | 1.734284  | -4.225327 | 0.748957  | H     | 1.712214  | -4.314390 | 0.515468  |
| C     | 2.570844  | -2.265986 | 0.490328  | C     | 2.557154  | -2.360274 | 0.393375  |
| H     | 3.592869  | -2.591657 | 0.670994  | H     | 3.579866  | -2.706663 | 0.516801  |
| C     | 2.315030  | -0.906489 | 0.234132  | C     | 2.312892  | -0.952799 | 0.248108  |
| C     | 0.971746  | -0.576863 | 0.025090  | C     | 0.952118  | -0.597173 | 0.117294  |
| H     | 0.688956  | 0.450554  | -0.162929 | H     | 0.690839  | 0.449000  | 0.026125  |
| N     | -0.035370 | -1.449267 | 0.034720  | N     | -0.063383 | -1.439721 | 0.086917  |
| B     | 3.422765  | 0.194780  | 0.180762  | B     | 3.399851  | 0.138328  | 0.190805  |
| C     | 2.974208  | 1.699792  | 0.359934  | C     | 2.950994  | 1.656287  | 0.355965  |
| C     | 4.917849  | -0.247114 | -0.055678 | C     | 4.909308  | -0.283304 | -0.043767 |
| C     | 2.254089  | 2.114671  | 1.507647  | C     | 2.267674  | 2.100288  | 1.516374  |
| C     | 1.832018  | 3.438348  | 1.630125  | C     | 1.861145  | 3.430777  | 1.632906  |
| C     | 2.070298  | 4.383915  | 0.634436  | C     | 2.086250  | 4.362792  | 0.622024  |
| C     | 2.776442  | 3.972671  | -0.494296 | C     | 2.754924  | 3.926557  | -0.520081 |
| C     | 3.241901  | 2.664146  | -0.641378 | C     | 3.195526  | 2.608277  | -0.663296 |
| C     | 5.277235  | -1.026851 | -1.180599 | C     | 5.288512  | -1.043600 | -1.176798 |
| C     | 6.606448  | -1.411358 | -1.370599 | C     | 6.625272  | -1.401898 | -1.370977 |
| C     | 7.608025  | -1.077674 | -0.463718 | C     | 7.622448  | -1.053886 | -0.465191 |
| C     | 7.249561  | -0.312443 | 0.646226  | C     | 7.248428  | -0.305983 | 0.651020  |
| C     | 5.940248  | 0.115362  | 0.857085  | C     | 5.928984  | 0.087368  | 0.868588  |
| C     | 1.928510  | 1.179581  | 2.648448  | C     | 1.956260  | 1.181968  | 2.673922  |
| H     | 1.298441  | 3.737993  | 2.531286  | H     | 1.355376  | 3.747443  | 2.544632  |
| C     | 1.576235  | 5.796129  | 0.779098  | C     | 1.620275  | 5.785522  | 0.763842  |
| H     | 2.985881  | 4.695588  | -1.281450 | H     | 2.955350  | 4.636995  | -1.321400 |
| C     | 3.995304  | 2.318118  | -1.900729 | C     | 3.903343  | 2.234799  | -1.940417 |
| C     | 4.279849  | -1.447451 | -2.234476 | C     | 4.297547  | -1.477339 | -2.229422 |
| H     | 6.865023  | -1.986936 | -2.258455 | H     | 6.893349  | -1.967152 | -2.262980 |
| C     | 9.026649  | -1.531634 | -0.663304 | C     | 9.050390  | -1.475834 | -0.671748 |
| H     | 8.016590  | -0.030536 | 1.366222  | H     | 8.009951  | -0.013402 | 1.373102  |
| H     | 0.914388  | 0.771113  | 2.553180  | H     | 0.950546  | 0.750059  | 2.584772  |
| H     | 1.971886  | 1.713302  | 3.604090  | H     | 1.985720  | 1.732022  | 3.621030  |

|    |           |           |           |    |           |           |           |
|----|-----------|-----------|-----------|----|-----------|-----------|-----------|
| H  | 2.610686  | 0.327985  | 2.711568  | H  | 2.654121  | 0.344194  | 2.746160  |
| H  | 1.861585  | 6.221828  | 1.747871  | H  | 1.931994  | 6.214931  | 1.722969  |
| H  | 0.480998  | 5.837523  | 0.721135  | H  | 0.524977  | 5.851352  | 0.725671  |
| H  | 1.977991  | 6.444465  | -0.005920 | H  | 2.020493  | 6.419530  | -0.033922 |
| H  | 4.187067  | 3.216016  | -2.496397 | H  | 4.097888  | 3.121409  | -2.552549 |
| H  | 3.430045  | 1.624159  | -2.535520 | H  | 3.302469  | 1.545595  | -2.547126 |
| H  | 4.956313  | 1.842792  | -1.681834 | H  | 4.858288  | 1.737594  | -1.744478 |
| H  | 3.456823  | -0.737274 | -2.351317 | H  | 3.505862  | -0.739737 | -2.388939 |
| H  | 3.826883  | -2.418011 | -1.997380 | H  | 3.798990  | -2.415313 | -1.954084 |
| H  | 4.771866  | -1.548972 | -3.207637 | H  | 4.800872  | -1.644739 | -3.187755 |
| H  | 9.259281  | -2.391615 | -0.022056 | H  | 9.307531  | -2.331856 | -0.034205 |
| H  | 9.740012  | -0.739452 | -0.410668 | H  | 9.747619  | -0.668217 | -0.421860 |
| H  | 9.208664  | -1.835583 | -1.698886 | H  | 9.234181  | -1.773208 | -1.709216 |
| C  | 5.651399  | 0.934898  | 2.088929  | C  | 5.623972  | 0.881914  | 2.112287  |
| H  | 5.156994  | 1.879699  | 1.842456  | H  | 5.106546  | 1.818479  | 1.881176  |
| H  | 4.994585  | 0.401367  | 2.787314  | H  | 4.979129  | 0.320825  | 2.800151  |
| H  | 6.576294  | 1.165035  | 2.626880  | H  | 6.543453  | 1.125517  | 2.654331  |
| H  | -4.132332 | -5.742873 | -0.247493 | H  | -4.265449 | -5.637214 | -0.353129 |
| Pt | -2.085403 | -0.987690 | -0.048363 | Pt | -2.086017 | -0.975725 | 0.011731  |
| C  | -4.052635 | -0.539643 | 0.139946  | C  | -4.066992 | -0.507182 | 0.164728  |
| N  | -1.900368 | 1.348421  | -0.491411 | N  | -1.864547 | 1.302516  | -0.470592 |
| C  | -5.251889 | -1.143409 | 0.543675  | C  | -5.281185 | -1.084107 | 0.558835  |
| C  | -4.225800 | 0.822435  | -0.128321 | C  | -4.205677 | 0.852561  | -0.124376 |
| C  | -1.056623 | 2.345548  | -0.799217 | C  | -0.987022 | 2.266925  | -0.796385 |
| C  | -3.181840 | 1.706197  | -0.437255 | C  | -3.137235 | 1.700600  | -0.436072 |
| C  | -6.462925 | -0.421134 | 0.588845  | C  | -6.476066 | -0.333201 | 0.576080  |
| H  | -5.283946 | -2.183631 | 0.853576  | H  | -5.338593 | -2.119156 | 0.883448  |
| C  | -5.403403 | 1.578743  | -0.086420 | C  | -5.364934 | 1.637002  | -0.112832 |
| C  | -1.489160 | 3.656093  | -1.030715 | C  | -1.384076 | 3.582706  | -1.055762 |
| H  | 0.001766  | 2.116601  | -0.867108 | H  | 0.064157  | 2.008012  | -0.853752 |
| C  | -3.722398 | 2.996594  | -0.619793 | C  | -3.640246 | 2.999842  | -0.650678 |
| C  | -6.587612 | 0.933821  | 0.268429  | C  | -6.566261 | 1.020003  | 0.235103  |
| N  | -5.085498 | 2.907699  | -0.394776 | N  | -5.008772 | 2.950533  | -0.440934 |
| C  | -2.839152 | 4.018262  | -0.943387 | C  | -2.723477 | 3.987491  | -0.986581 |
| H  | -7.550774 | 1.433464  | 0.313472  | H  | -7.519509 | 1.539336  | 0.261527  |
| C  | -6.033293 | 3.981591  | -0.521531 | C  | -5.926177 | 4.046877  | -0.604678 |
| H  | -5.533152 | 4.936461  | -0.337412 | H  | -5.405204 | 4.990982  | -0.423830 |
| H  | -6.495932 | 4.011077  | -1.516698 | H  | -6.365541 | 4.071730  | -1.610142 |
| H  | -6.821311 | 3.864485  | 0.228405  | H  | -6.732254 | 3.961455  | 0.129817  |
| H  | -7.360773 | -0.953412 | 0.896465  | H  | -7.389681 | -0.840052 | 0.879295  |
| H  | -0.743633 | 4.403979  | -1.281019 | H  | -0.613212 | 4.302826  | -1.309407 |
| H  | -3.152527 | 5.043231  | -1.122090 | H  | -3.002826 | 5.017866  | -1.188130 |
